# Supplementary material for: Blast cells surviving acute myeloid leukemia induction therapy are in cycle with a signature of FOXM1 activity
Source: PubMed Central journal article supplement (PMC8554867; doi:10.1186/s12885-021-08839-9), 2021-10-28
Supplement: 12885_2021_8839_MOESM3_ESM.pdf [file 12885_2021_8839_MOESM3_ESM.pdf]

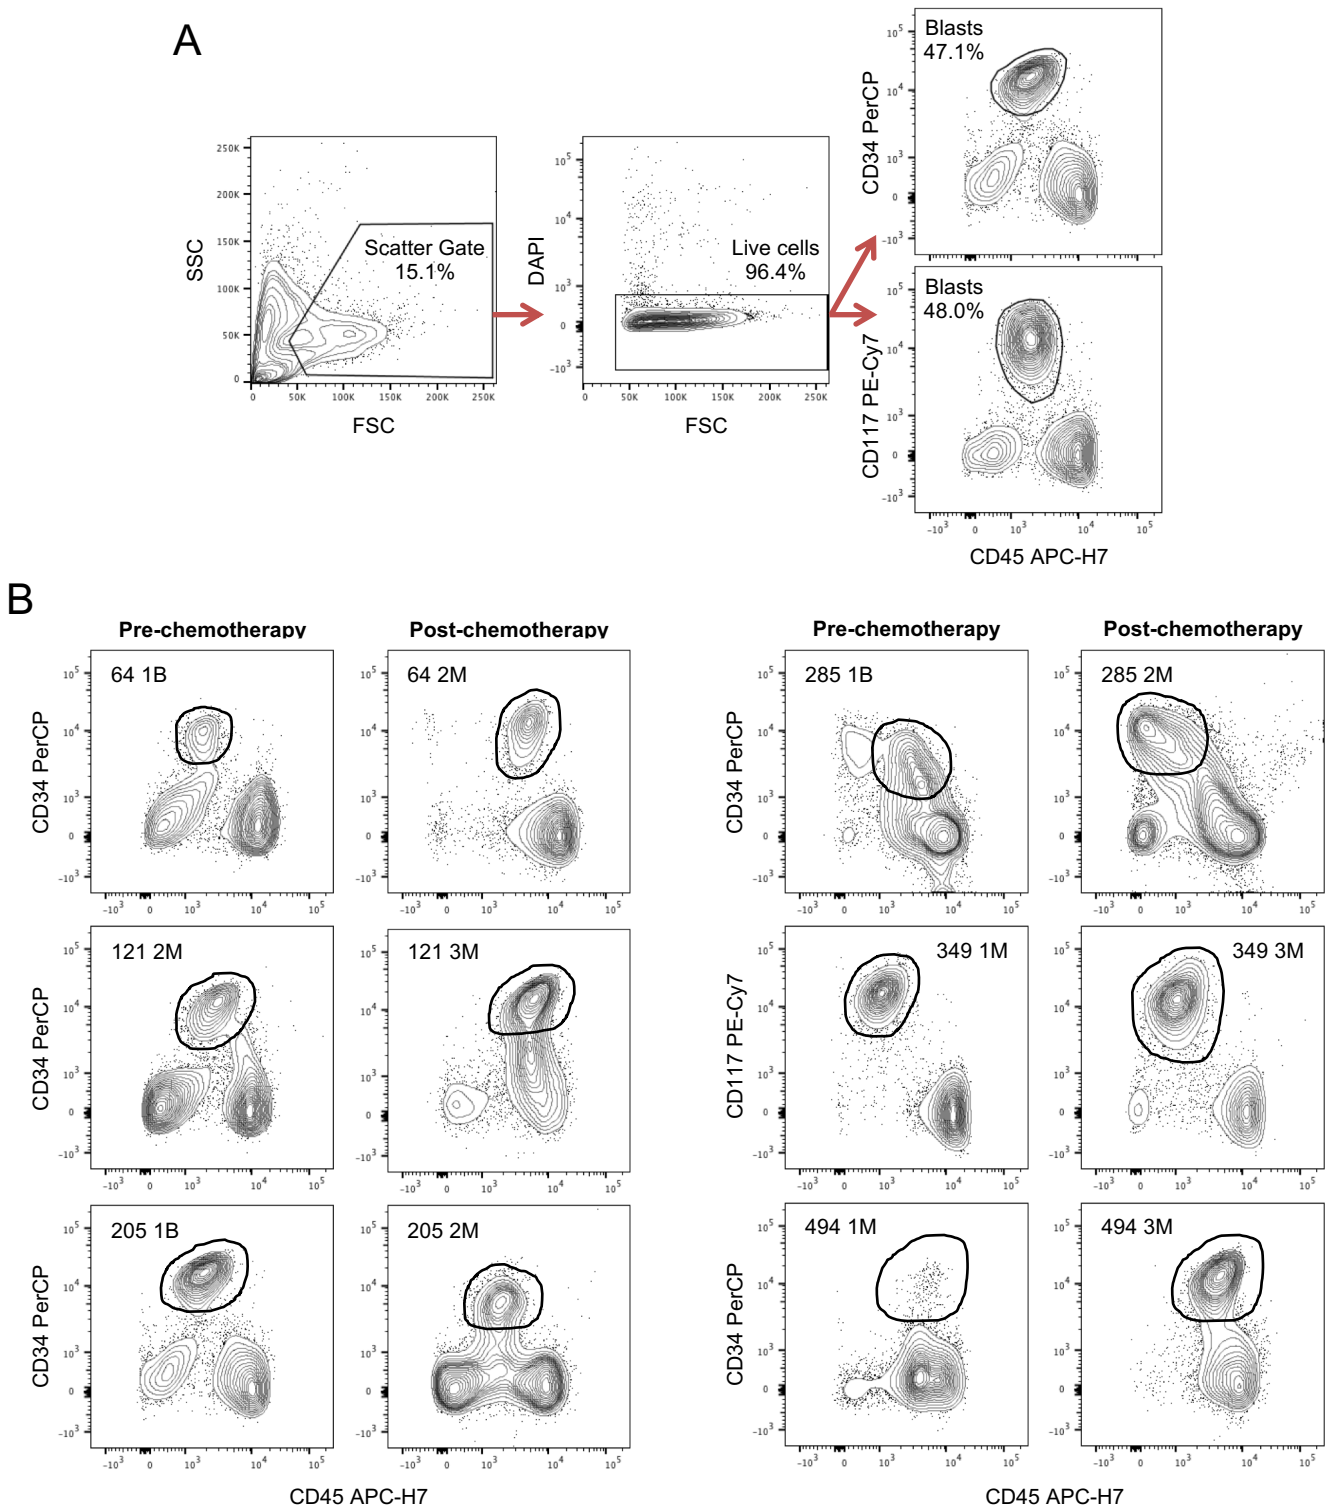

**Figure S1.** Flow cytometry gating strategy.

(A) Representative flow cytometry scatter plots showing the gating approach used to isolate blasts on the basis of scatter characteristics, DAPI negativity,  $CD45^{low/int}$  expression and expression of either CD34 or CD117. (B) Flow cytometry scatter plots show gating strategy for the blast populations isolated from each sample.

**A**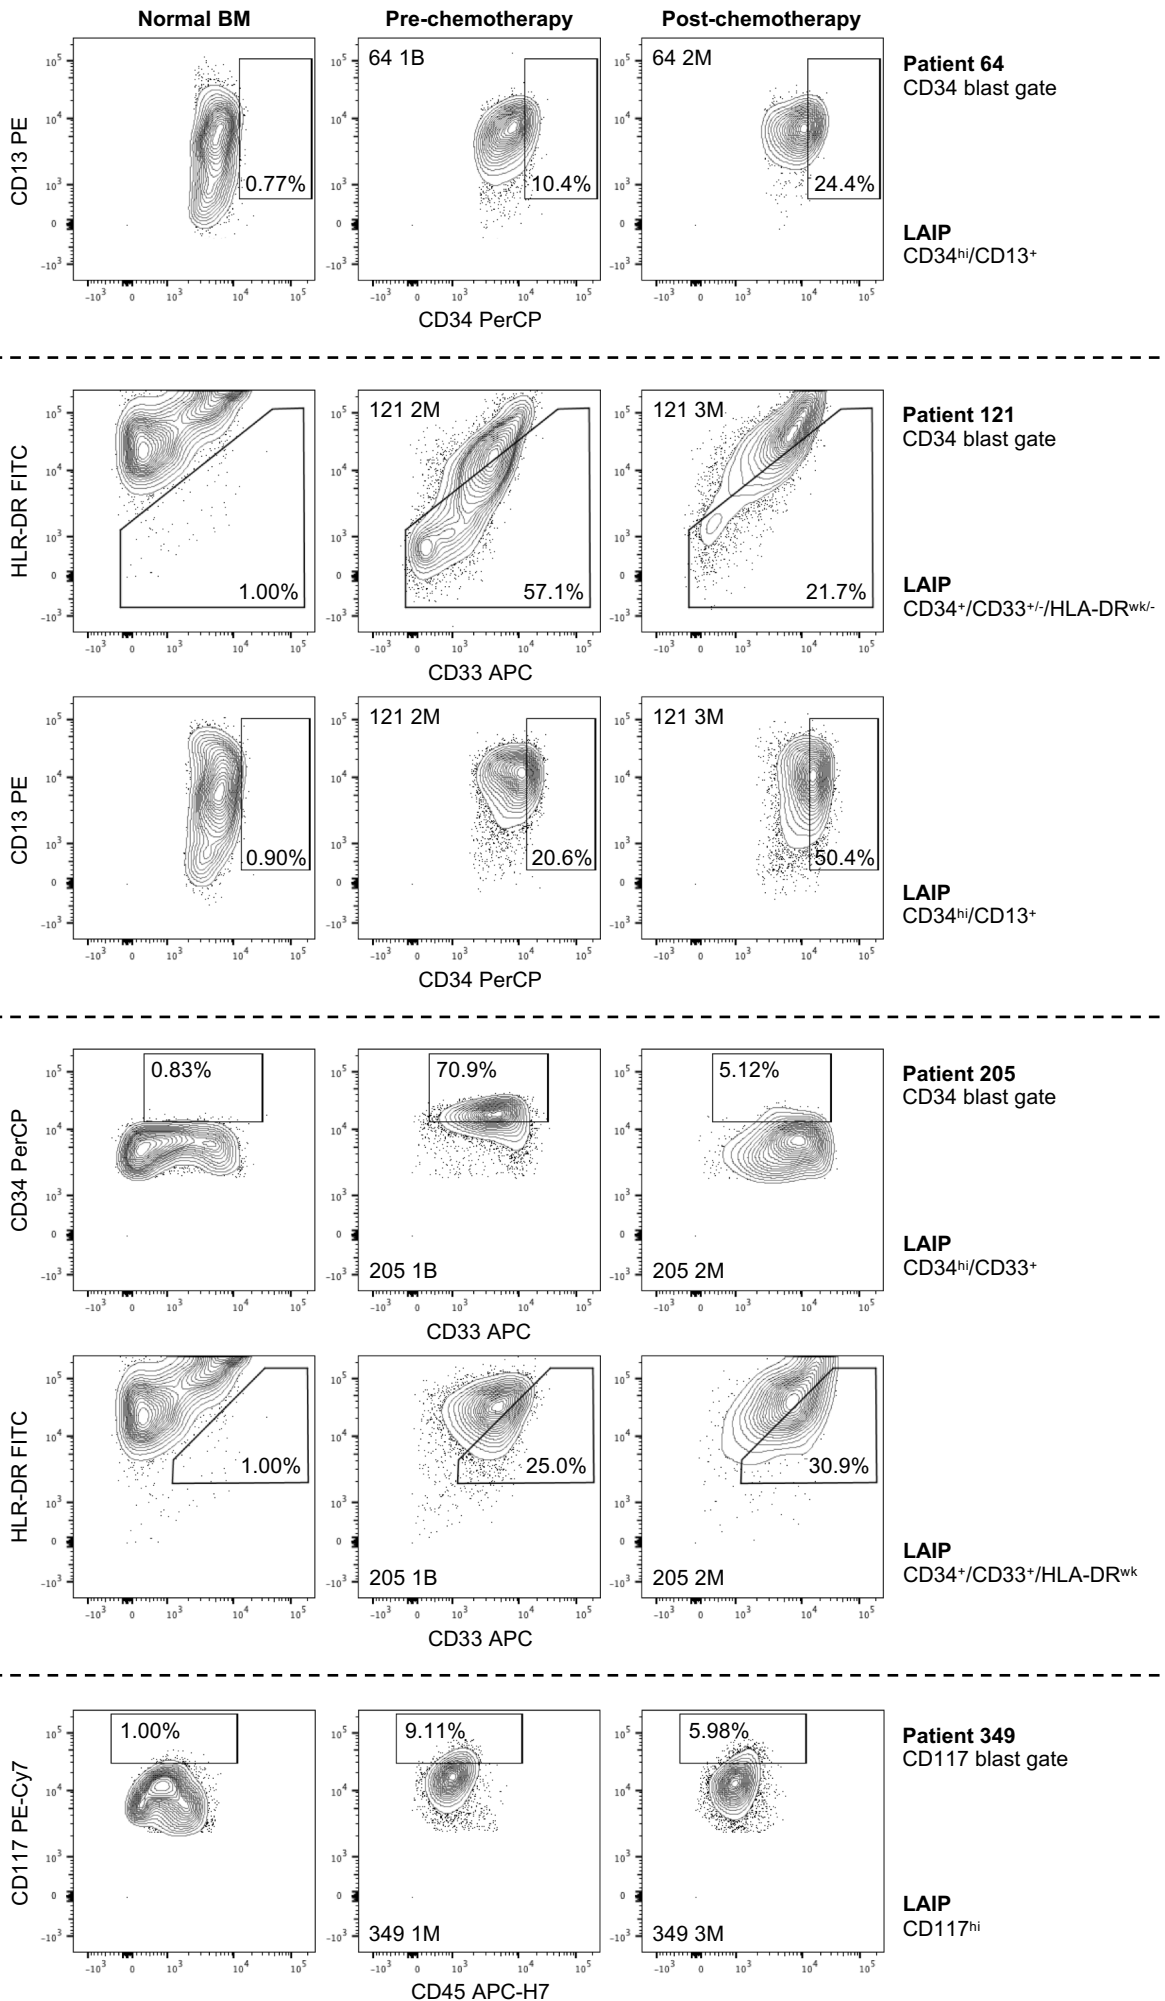

**B**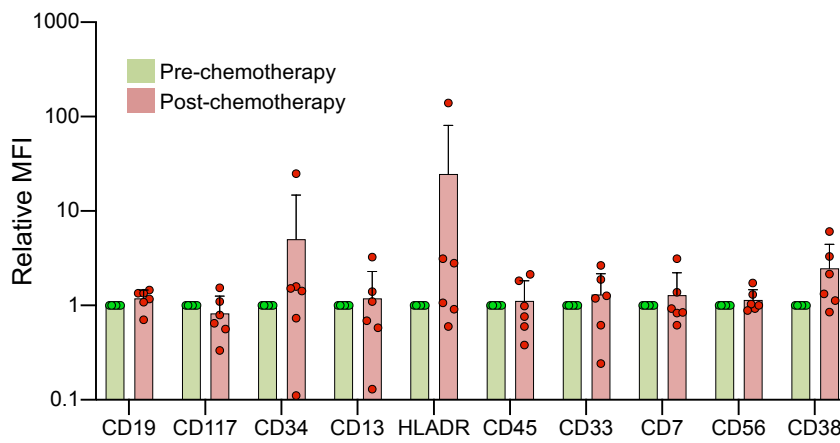

**Figure S2.** Leukemia associated immunophenotypes (LAIPs).

(A) Flow cytometry scatter plots showing the highest frequency leukemia associated immunophenotypes (LAIPs) identified in the indicated primary AML samples using a difference-from-normal gating strategy. (B) Mean $\pm$ SD relative median fluorescence intensity (MFI) for the indicated cell surface markers on primary AML blasts pre- and post-chemotherapy (n=6). *P*=not significant by unpaired t-test for all comparisons.

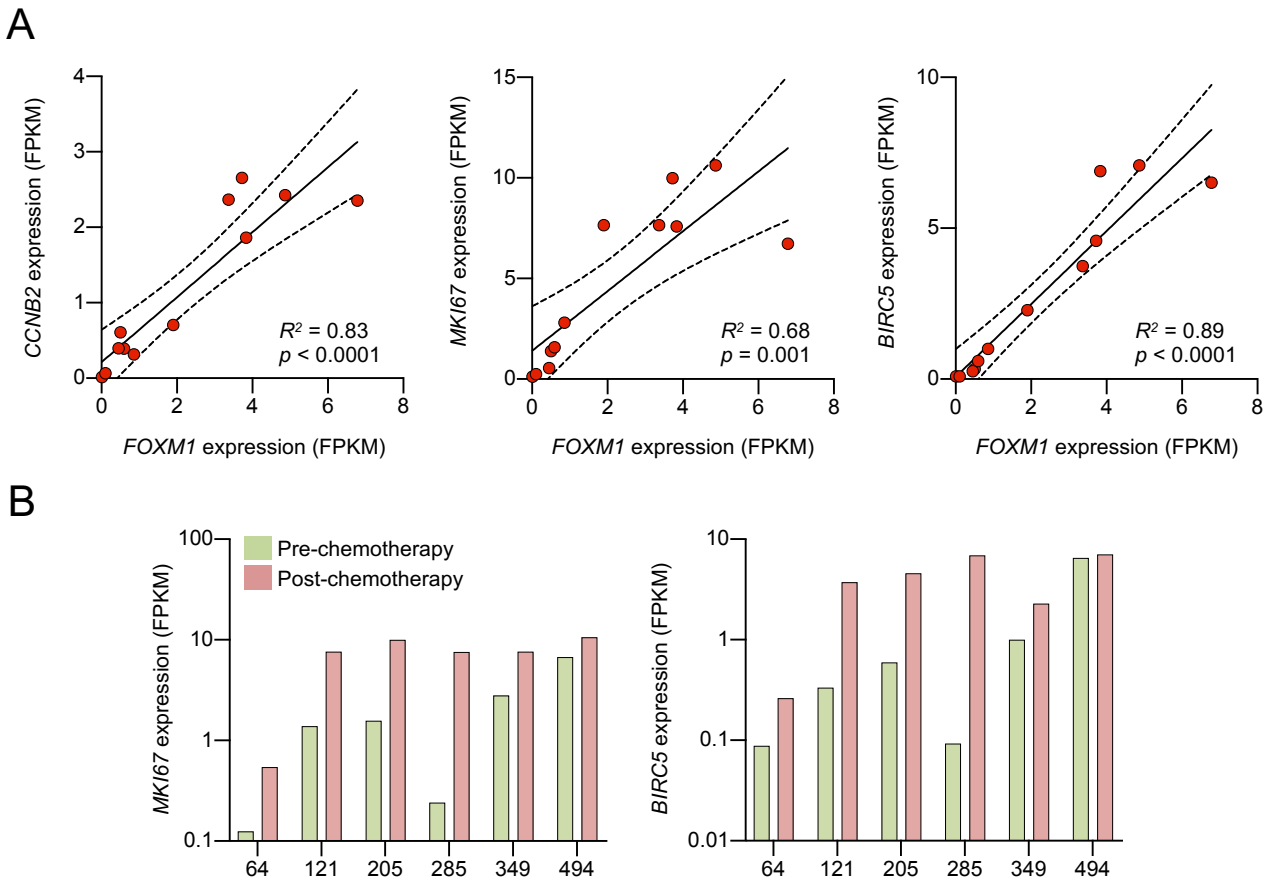

**Figure S3.** Gene set enrichment analysis (GSEA) and *FOXM1* correlation analyses in post-chemotherapy blasts.

(A) Scatter plots show correlations between *FOXM1* and the indicated cell cycle genes.  $R$  represents the Pearson product moment correlation coefficient. Dashed lines indicated 95% confidence intervals for the line of best fit. (B) Bar charts show expression of the indicated genes in all samples. FPKM, fragments per kilobase of transcript per million mapped reads.

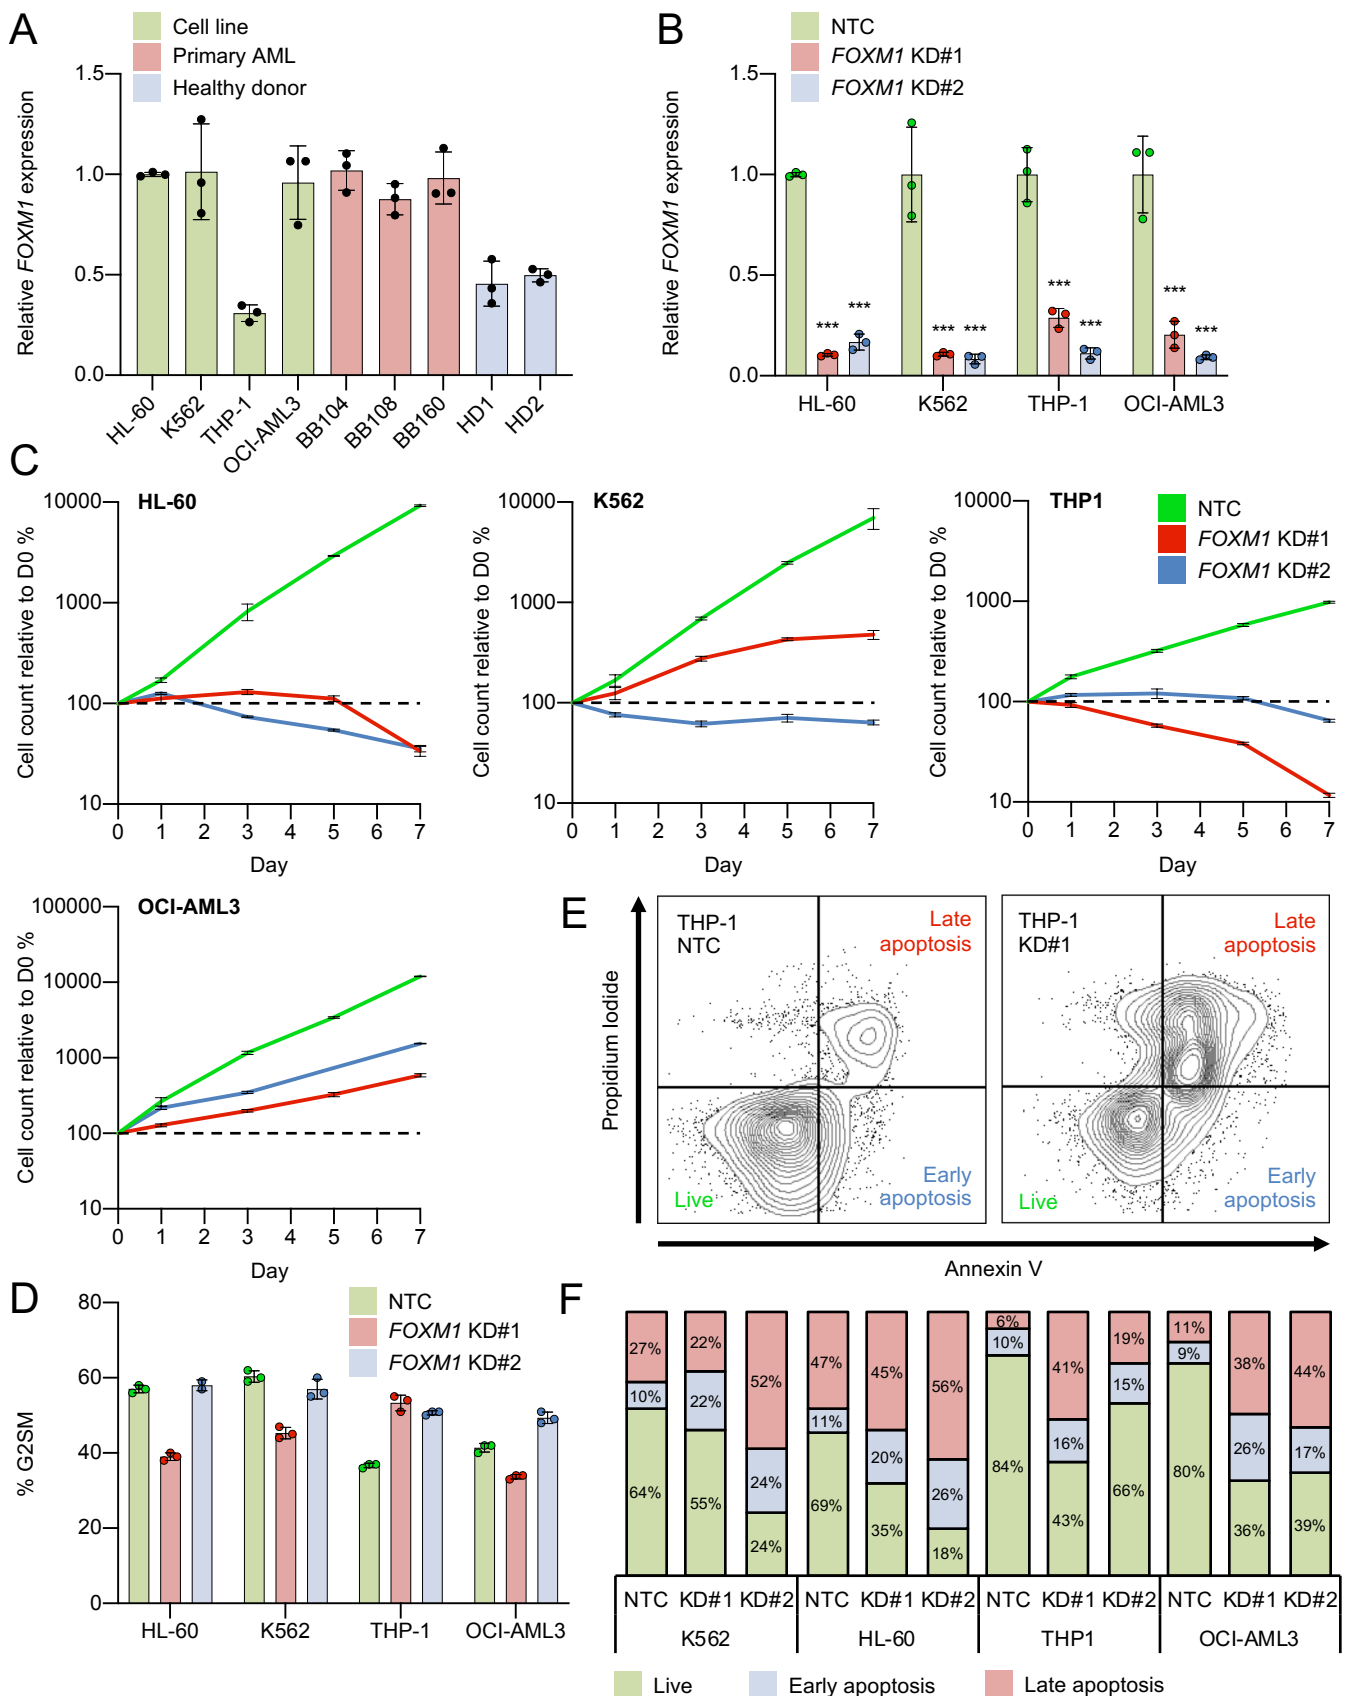

**Figure S4.** *FOXM1* KD in AML cell lines.

(A) Mean $\pm$ SD (n=3) *FOXM1* expression relative to HL-60 cells by quantitative PCR in AML cell lines, primary AML and normal CD34<sup>+</sup> HSPCs from healthy donors. (B) Mean $\pm$ SD (n=3) *FOXM1* expression in KD versus control conditions for the indicated lines. \*\*\*  $P < 0.001$  (one-way ANOVA with Dunnett's multiple comparison test). (C) Graphs show mean $\pm$ SD (n=3) cell count relative to Day 0 on the indicated day of culture for the indicated conditions. (D) Mean $\pm$ SD (n=3) percentage of cells in G2SM in *FOXM1* KD versus control. (E) Representative flow cytometry scatter plots. (F) Proportion of live, early and late apoptotic cells for *FOXM1* KDs versus control for the indicated cell lines (n=3). NTC, non-targeting control; BB numbers indicate Biobank identifier.

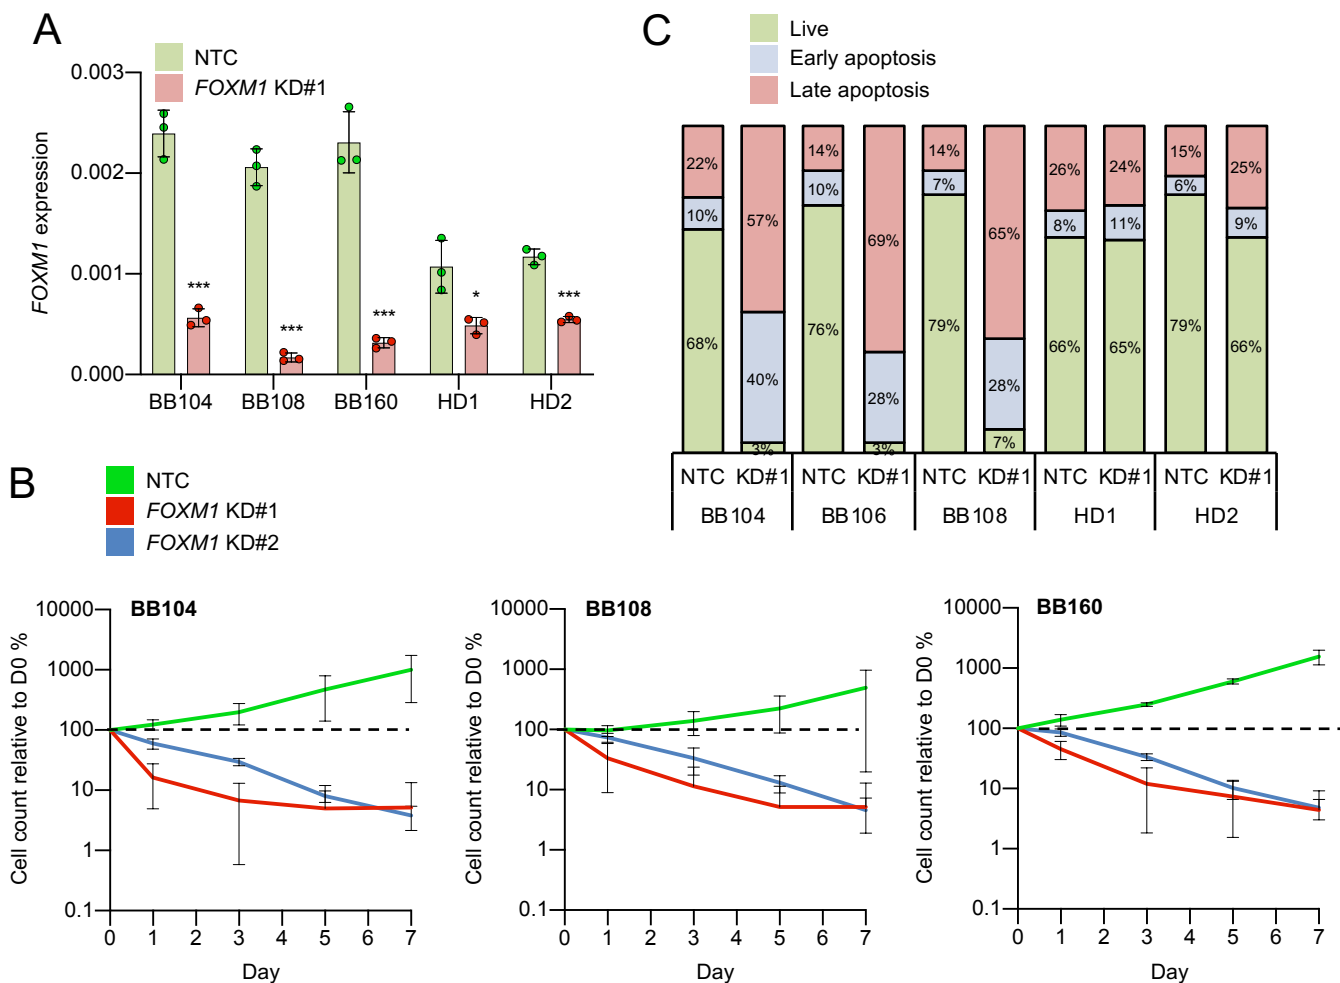

**Figure S5.** *FOXM1* knockdown in primary AML and normal CD34<sup>+</sup> HSPCs..

(A) Mean±SD (n=3) *FOXM1* expression by quantitative PCR in the indicated conditions and the indicated primary AML and normal CD34<sup>+</sup> HSPC cell types. \*  $P < 0.05$ , \*\*\*  $P < 0.001$  by unpaired *t* test. (B) Graphs show mean±SD (n=3) cell count on the indicated day of culture for the indicated primary AML samples. (C) Proportion of live, early and late apoptotic cells for *FOXM1* KD versus control for the indicated primary AML and normal CD34<sup>+</sup> HSPCs (n=3 for primary AML, n=1 for normal CD34<sup>+</sup> HSPCs); see Figure S4E for definitions. NTC, non-targeting control; BB numbers indicate Biobank identifier.

**A**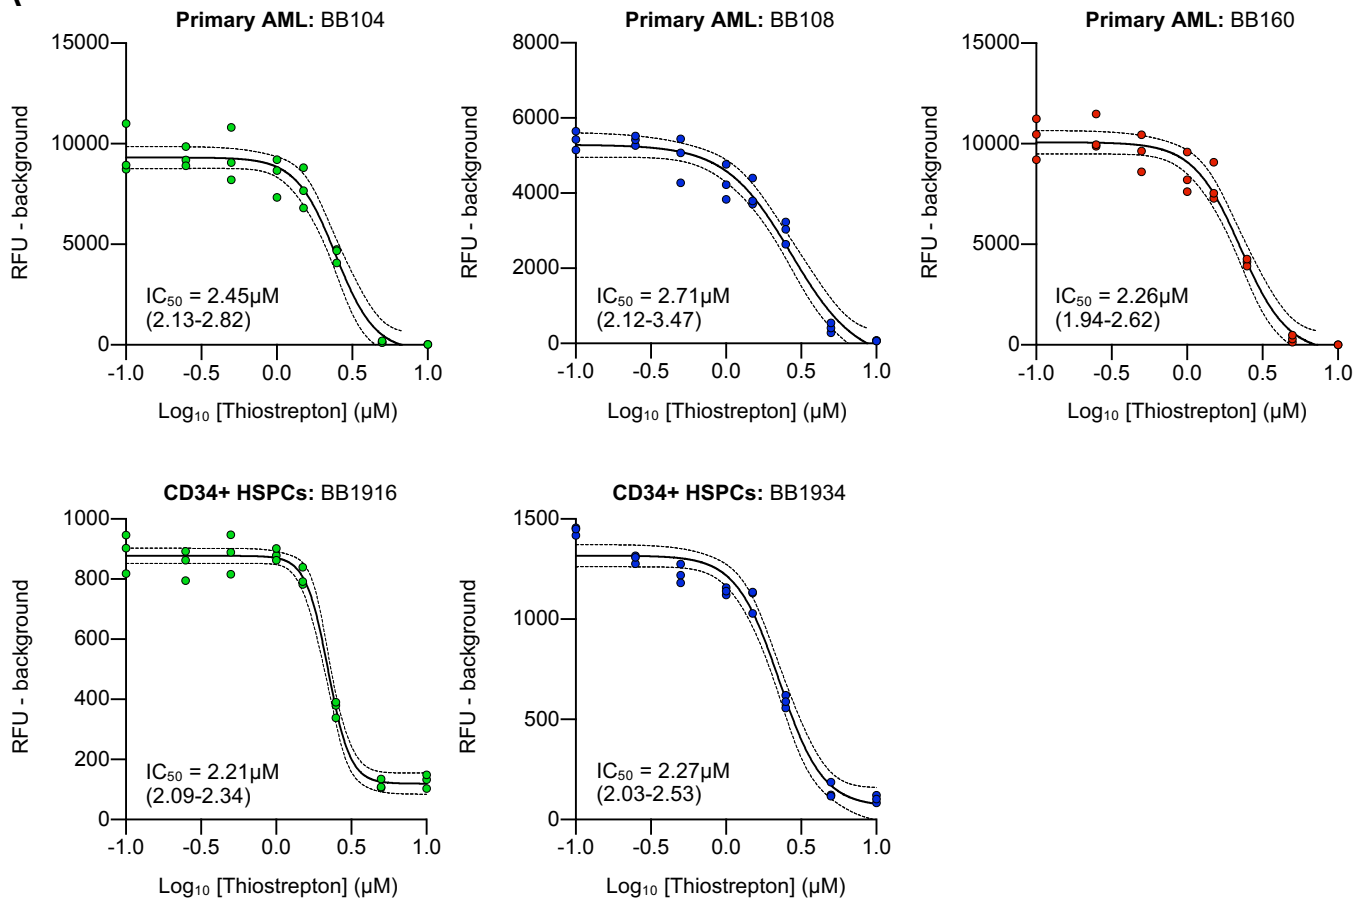**B**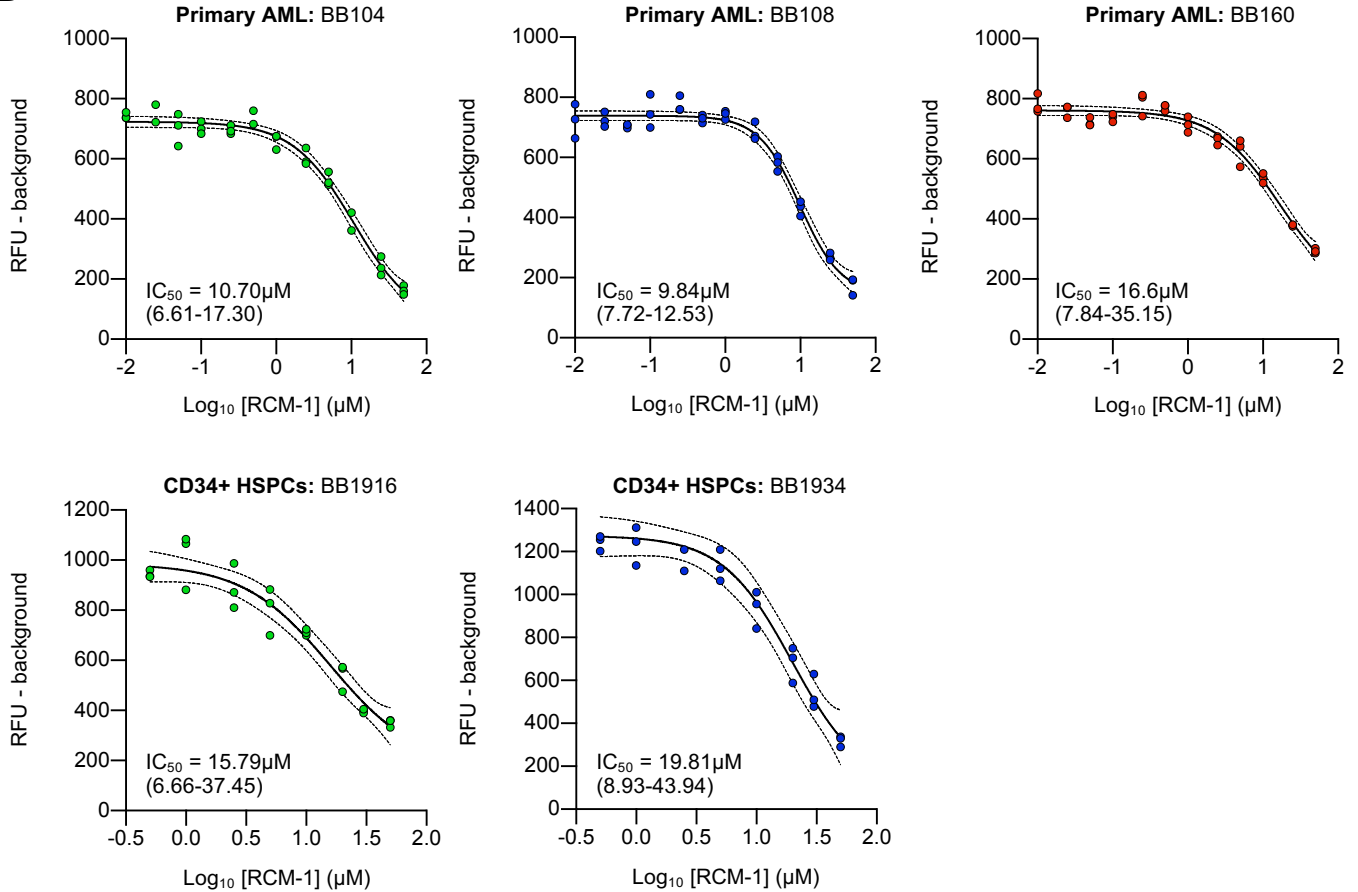

C

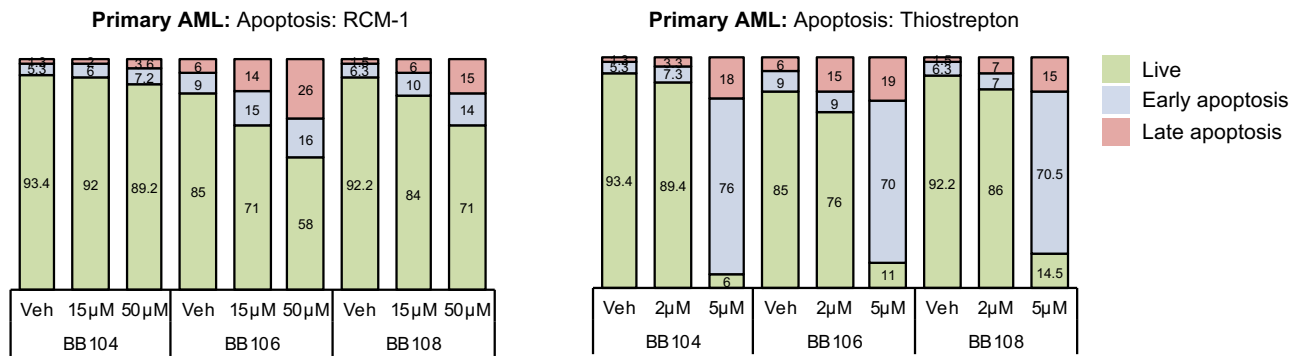

D

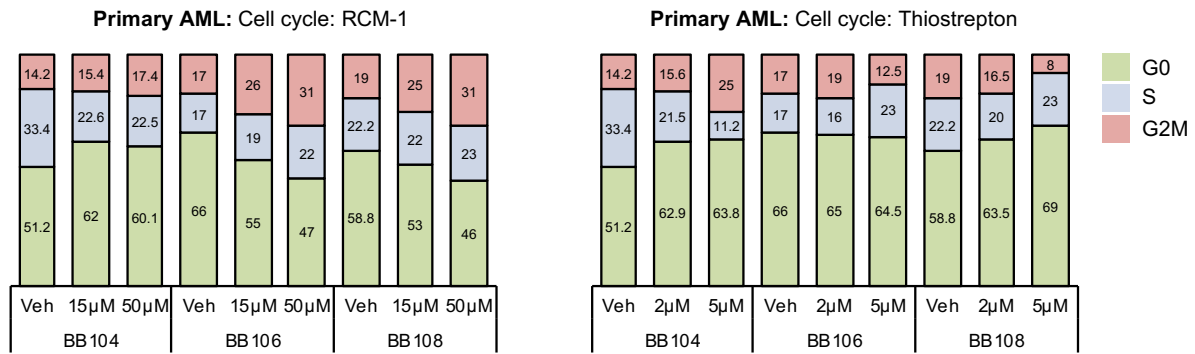

**Figure S6.** FOXM1 inhibition in primary AML and normal CD34+ HSPCs.

(A-B) Dose response curves for primary AML and normal CD34<sup>+</sup> HSPCs treated with Thiostrepton (A) or RCM-1 (B). IC<sub>50</sub> shown with 95% CI in parentheses (n=3). RFU, relative fluorescence units. (C) Proportion of live, early and late apoptotic cells for RCM-1 (left) or Thiostrepton (right) versus vehicle for the indicated primary AML. (D) Proportion of cells in G0, S or G2M phase for RCM-1 (left) or Thiostrepton (right) versus vehicle for the indicated primary AML. BB numbers indicate Biobank identifier.
